# Supplementary material
Source: publisher figshare collection journal article supplement (https://acs.figshare.com/ndownloader/files/5677536)
Supplement: Supplementary file 1 [file 5677536]

 
data_sulphate salt of m-xylyeneguanidinium
 
_audit_creation_method            SHELXL-97
_chemical_name_systematic
;
 ?
;
_chemical_name_common             m-xylyenediguanidinium sulfate
_chemical_melting_point           335 decomp.
_chemical_formula_moiety          C10 H18 O4 S1
_chemical_formula_sum
 'C10 H18 N6 O4 S'
_chemical_formula_weight          318.36
 
loop_
 _atom_type_symbol
 _atom_type_description
 _atom_type_scat_dispersion_real
 _atom_type_scat_dispersion_imag
 _atom_type_scat_source
 'C'  'C'   0.0033   0.0016
 'International Tables Vol C Tables 4.2.6.8 and 6.1.1.4'
 'H'  'H'   0.0000   0.0000
 'International Tables Vol C Tables 4.2.6.8 and 6.1.1.4'
 'N'  'N'   0.0061   0.0033
 'International Tables Vol C Tables 4.2.6.8 and 6.1.1.4'
 'O'  'O'   0.0106   0.0060
 'International Tables Vol C Tables 4.2.6.8 and 6.1.1.4'
 'S'  'S'   0.1246   0.1234
 'International Tables Vol C Tables 4.2.6.8 and 6.1.1.4'
 
_symmetry_cell_setting            Orthorhombic
_symmetry_space_group_name_H-M    Pbca
 
loop_
 _symmetry_equiv_pos_as_xyz
 'x, y, z'
 '-x+1/2, -y, z+1/2'
 '-x, y+1/2, -z+1/2'
 'x+1/2, -y+1/2, -z'
 '-x, -y, -z'
 'x-1/2, y, -z-1/2'
 'x, -y-1/2, z-1/2'
 '-x-1/2, y-1/2, z'
 
_cell_length_a                    11.057(2)
_cell_length_b                    13.059(3)
_cell_length_c                    19.496(4)
_cell_angle_alpha                 90.00
_cell_angle_beta                  90.00
_cell_angle_gamma                 90.00
_cell_volume                      2815.1(10)
_cell_formula_units_Z             8
_cell_measurement_temperature    150(2)
_cell_measurement_reflns_used     ?
_cell_measurement_theta_min       ?
_cell_measurement_theta_max       ?
 
_exptl_crystal_description        needle
_exptl_crystal_colour             colourless
_exptl_crystal_size_max           0.15mm
_exptl_crystal_size_mid           0.05mm
_exptl_crystal_size_min           0.02mm
_exptl_crystal_density_meas       'not measured'
_exptl_crystal_density_diffrn     1.315
_exptl_crystal_density_method     'not measured'
_exptl_crystal_F_000              1176
_exptl_absorpt_coefficient_mu     0.225
_exptl_absorpt_correction_type    Multi-scan
_exptl_absorpt_correction_T_min   0.612
_exptl_absorpt_correction_T_max   7
_exptl_absorpt_process_details    
;
 Using multiple and symmetry-related data measurements via the program SORTAV
 See R. H. Blessing, Acta Crysta (1995), A51, 33-38
;
 
_exptl_special_details
;
 PLEASE NOTE cell_measurement_ fields are not relevant to area detector data, 
 the entire data set is used to refine the cell, which is indexed from all
 observed reflections in a 10 degree phi range.
;
 
_diffrn_ambient_temperature       150(2)
_diffrn_radiation_wavelength      0.71073
_diffrn_radiation_type            MoK\a
_diffrn_radiation_source          'Enraf Nonius FR591 rotating anode'
_diffrn_radiation_monochromator   graphite
_diffrn_measurement_device_type   'Enraf Nonius Kappa CCD area detector'
_diffrn_measurement_method        'Phi and Omega scans to fill Ewald sphere'
_diffrn_detector_area_resol_mean  9.091
_diffrn_standards_number          ?
_diffrn_standards_interval_count  ?
_diffrn_standards_interval_time   ?
_diffrn_standards_decay_%         ?
_diffrn_reflns_number             25570
_diffrn_reflns_av_R_equivalents   0.1346
_diffrn_reflns_av_sigmaI/netI     0.0629
_diffrn_reflns_limit_h_min        -13
_diffrn_reflns_limit_h_max        13
_diffrn_reflns_limit_k_min        -14
_diffrn_reflns_limit_k_max        15
_diffrn_reflns_limit_l_min        -23
_diffrn_reflns_limit_l_max        23
_diffrn_reflns_theta_min          2.09
_diffrn_reflns_theta_max          25.03
_reflns_number_total              2491
_reflns_number_gt                 1745
_reflns_threshold_expression      >2sigma(I)
 
_computing_data_collection        
loop_
' DENZO (Otwinoski and Minor, 1997)'
' COLLECT (Hooft, 1998)'
_computing_cell_refinement        'DENZO and COLLECT'
_computing_data_reduction         'DENZO and COLLECT'
_computing_structure_solution     'SHELXS-97 (Sheldrick, 1990)'
_computing_structure_refinement   'SHELXL-97 (Sheldrick, 1997)'
_computing_molecular_graphics     'CAMERON (Watkin and Pearce, 1995)'
_computing_publication_material   ?
 
_refine_special_details
;
 Refinement of F^2^ against ALL reflections.  The weighted R-factor wR and
 goodness of fit S are based on F^2^, conventional R-factors R are based
 on F, with F set to zero for negative F^2^. The threshold expression of
 F^2^ > 2sigma(F^2^) is used only for calculating R-factors(gt) etc. and is
 not relevant to the choice of reflections for refinement.  R-factors based
 on F^2^ are statistically about twice as large as those based on F, and R-
 factors based on ALL data will be even larger.
;
 
_refine_ls_structure_factor_coef  Fsqd
_refine_ls_matrix_type            full
_refine_ls_weighting_scheme       calc
_refine_ls_weighting_details
 'calc w=1/[\s^2^(Fo^2^)+(0.1000P)^2^+0.0000P] where P=(Fo^2^+2Fc^2^)/3'
_atom_sites_solution_primary      direct
_atom_sites_solution_secondary    difmap
_atom_sites_solution_hydrogens    geom
_refine_ls_hydrogen_treatment     mixed
_refine_ls_extinction_method      none
_refine_ls_extinction_coef        ?
_refine_ls_number_reflns          2491
_refine_ls_number_parameters      262
_refine_ls_number_restraints      0
_refine_ls_R_factor_all           0.0767
_refine_ls_R_factor_gt            0.0425
_refine_ls_wR_factor_ref          0.1287
_refine_ls_wR_factor_gt           0.1060
_refine_ls_goodness_of_fit_ref    0.838
_refine_ls_restrained_S_all       0.838
_refine_ls_shift/su_max           0.007
_refine_ls_shift/su_mean          0.001
 
loop_
 _atom_site_label
 _atom_site_type_symbol
 _atom_site_fract_x
 _atom_site_fract_y
 _atom_site_fract_z
 _atom_site_U_iso_or_equiv
 _atom_site_adp_type
 _atom_site_occupancy
 _atom_site_symmetry_multiplicity
 _atom_site_calc_flag
 _atom_site_refinement_flags
 _atom_site_disorder_assembly
 _atom_site_disorder_group
S1 S 0.17186(6) 0.86717(5) 0.38220(4) 0.0190(2) Uani 1 1 d . . .
O1 O 0.18093(16) 0.75910(15) 0.35909(10) 0.0227(5) Uani 1 1 d . . .
O3 O 0.15451(17) 0.86800(15) 0.45724(10) 0.0237(5) Uani 1 1 d . . .
N6 N 0.8000(2) 0.77710(19) 0.47257(13) 0.0236(6) Uani 1 1 d . . .
O2 O 0.06696(17) 0.91605(15) 0.34909(11) 0.0283(5) Uani 1 1 d . . .
O4 O 0.28400(17) 0.92073(16) 0.36477(11) 0.0298(5) Uani 1 1 d . . .
N1 N 0.4364(2) 0.8000(2) 0.26847(15) 0.0245(6) Uani 1 1 d . . .
N5 N 0.8759(2) 0.9427(2) 0.47084(15) 0.0254(6) Uani 1 1 d . . .
N4 N 0.7140(2) 0.9002(2) 0.53978(14) 0.0241(6) Uani 1 1 d . . .
C8 C 0.7536(3) 0.6441(2) 0.34640(16) 0.0226(7) Uani 1 1 d . . .
C10 C 0.7991(2) 0.8735(2) 0.49406(15) 0.0208(6) Uani 1 1 d . . .
C1 C 0.4708(2) 0.7039(2) 0.28248(14) 0.0202(7) Uani 1 1 d . . .
N2 N 0.4118(3) 0.6521(2) 0.33105(14) 0.0270(6) Uani 1 1 d . . .
N3 N 0.5621(2) 0.66429(19) 0.24859(14) 0.0228(6) Uani 1 1 d . . .
C3 C 0.7167(2) 0.5592(2) 0.30979(14) 0.0202(7) Uani 1 1 d . . .
C5 C 0.8740(3) 0.4605(2) 0.36428(16) 0.0263(7) Uani 1 1 d . . .
C9 C 0.8940(3) 0.7338(3) 0.42871(18) 0.0299(7) Uani 1 1 d . . .
C7 C 0.8513(2) 0.6384(2) 0.39260(15) 0.0243(7) Uani 1 1 d . . .
C6 C 0.9099(3) 0.5459(2) 0.40101(16) 0.0257(7) Uani 1 1 d . . .
C4 C 0.7790(3) 0.4673(2) 0.31843(16) 0.0239(7) Uani 1 1 d . . .
C2 C 0.6131(3) 0.5633(2) 0.25874(17) 0.0243(7) Uani 1 1 d . . .
H5 H 0.550(2) 0.517(2) 0.2727(13) 0.014(7) Uiso 1 1 d . . .
H8 H 0.978(3) 0.539(2) 0.4339(16) 0.030(8) Uiso 1 1 d . . .
H4 H 0.640(3) 0.538(2) 0.2149(17) 0.025(8) Uiso 1 1 d . . .
H10 H 0.920(3) 0.784(3) 0.3975(17) 0.030(9) Uiso 1 1 d . . .
H6 H 0.754(2) 0.407(2) 0.2953(16) 0.019(7) Uiso 1 1 d . . .
H9 H 0.708(3) 0.712(3) 0.3407(16) 0.032(8) Uiso 1 1 d . . .
H7 H 0.918(3) 0.397(3) 0.3717(17) 0.038(9) Uiso 1 1 d . . .
H2 H 0.389(3) 0.830(3) 0.2973(19) 0.037(10) Uiso 1 1 d . . .
H13 H 0.679(3) 0.847(3) 0.5638(18) 0.040(10) Uiso 1 1 d . . .
H11 H 0.742(3) 0.730(3) 0.4905(19) 0.046(10) Uiso 1 1 d . . .
H3 H 0.595(3) 0.700(3) 0.2168(19) 0.035(10) Uiso 1 1 d . . .
H12 H 0.872(3) 1.009(3) 0.4885(16) 0.027(8) Uiso 1 1 d . . .
H1 H 0.346(4) 0.675(3) 0.342(2) 0.047(11) Uiso 1 1 d . . .
H17 H 0.479(3) 0.833(3) 0.237(2) 0.050(11) Uiso 1 1 d . . .
H15 H 0.963(3) 0.720(3) 0.4560(18) 0.044(10) Uiso 1 1 d . . .
H16 H 0.424(3) 0.587(3) 0.3373(17) 0.028(9) Uiso 1 1 d . . .
H19 H 0.716(3) 0.958(3) 0.5564(17) 0.023(9) Uiso 1 1 d . . .
H30 H 0.925(3) 0.930(3) 0.443(2) 0.038(11) Uiso 1 1 d . . .
 
loop_
 _atom_site_aniso_label
 _atom_site_aniso_U_11
 _atom_site_aniso_U_22
 _atom_site_aniso_U_33
 _atom_site_aniso_U_23
 _atom_site_aniso_U_13
 _atom_site_aniso_U_12
S1 0.0181(4) 0.0180(4) 0.0210(4) -0.0007(3) -0.0007(3) 0.0004(3)
O1 0.0244(10) 0.0192(11) 0.0244(12) -0.0061(8) -0.0033(8) -0.0004(8)
O3 0.0291(11) 0.0217(11) 0.0204(11) -0.0001(9) 0.0025(8) 0.0025(8)
N6 0.0231(13) 0.0217(15) 0.0261(15) -0.0051(11) 0.0060(10) -0.0045(11)
O2 0.0283(12) 0.0238(12) 0.0329(13) 0.0040(9) -0.0080(9) 0.0044(9)
O4 0.0258(11) 0.0279(13) 0.0357(14) -0.0035(10) 0.0081(9) -0.0080(9)
N1 0.0258(14) 0.0217(15) 0.0260(16) -0.0001(12) 0.0060(12) 0.0012(11)
N5 0.0246(14) 0.0210(16) 0.0304(16) -0.0049(12) 0.0058(12) -0.0043(11)
N4 0.0244(14) 0.0217(16) 0.0261(16) -0.0031(13) 0.0039(11) -0.0023(11)
C8 0.0227(15) 0.0188(16) 0.0264(18) 0.0016(13) 0.0074(12) -0.0003(12)
C10 0.0193(13) 0.0230(17) 0.0200(16) 0.0000(13) -0.0044(11) 0.0003(12)
C1 0.0205(14) 0.0191(16) 0.0211(17) -0.0019(13) -0.0034(11) -0.0009(11)
N2 0.0247(14) 0.0273(17) 0.0291(16) 0.0063(12) 0.0071(11) 0.0032(12)
N3 0.0225(13) 0.0247(14) 0.0213(15) 0.0038(11) 0.0075(10) 0.0018(11)
C3 0.0208(14) 0.0204(16) 0.0195(16) -0.0021(12) 0.0075(11) -0.0001(12)
C5 0.0259(16) 0.0216(18) 0.0313(19) -0.0012(14) 0.0013(13) 0.0039(13)
C9 0.0251(17) 0.0309(19) 0.034(2) -0.0070(16) 0.0033(14) -0.0018(14)
C7 0.0214(14) 0.0287(18) 0.0229(17) -0.0034(13) 0.0080(12) -0.0042(12)
C6 0.0202(15) 0.0308(19) 0.0262(17) 0.0007(14) 0.0001(12) -0.0004(12)
C4 0.0262(15) 0.0201(17) 0.0256(18) -0.0038(14) 0.0041(12) -0.0009(12)
C2 0.0230(16) 0.0223(17) 0.0276(18) -0.0003(14) 0.0026(13) -0.0015(13)
 
_geom_special_details
;
 All esds (except the esd in the dihedral angle between two l.s. planes)
 are estimated using the full covariance matrix.  The cell esds are taken
 into account individually in the estimation of esds in distances, angles
 and torsion angles; correlations between esds in cell parameters are only
 used when they are defined by crystal symmetry.  An approximate (isotropic)
 treatment of cell esds is used for estimating esds involving l.s. planes.
;
 
loop_
 _geom_bond_atom_site_label_1
 _geom_bond_atom_site_label_2
 _geom_bond_distance
 _geom_bond_site_symmetry_2
 _geom_bond_publ_flag
S1 O4 1.464(2) . ?
S1 O2 1.473(2) . ?
S1 O3 1.475(2) . ?
S1 O1 1.485(2) . ?
N6 C10 1.326(4) . ?
N6 C9 1.460(4) . ?
N1 C1 1.339(4) . ?
N5 C10 1.320(4) . ?
N4 C10 1.342(4) . ?
C8 C3 1.380(4) . ?
C8 C7 1.409(4) . ?
C1 N3 1.313(4) . ?
C1 N2 1.334(4) . ?
N3 C2 1.448(4) . ?
C3 C4 1.395(4) . ?
C3 C2 1.518(4) . ?
C5 C4 1.382(4) . ?
C5 C6 1.383(4) . ?
C9 C7 1.506(4) . ?
C7 C6 1.381(4) . ?
 
loop_
 _geom_angle_atom_site_label_1
 _geom_angle_atom_site_label_2
 _geom_angle_atom_site_label_3
 _geom_angle
 _geom_angle_site_symmetry_1
 _geom_angle_site_symmetry_3
 _geom_angle_publ_flag
O4 S1 O2 110.99(12) . . ?
O4 S1 O3 109.69(12) . . ?
O2 S1 O3 109.21(12) . . ?
O4 S1 O1 109.05(12) . . ?
O2 S1 O1 109.39(12) . . ?
O3 S1 O1 108.46(12) . . ?
C10 N6 C9 123.9(2) . . ?
C3 C8 C7 121.0(3) . . ?
N5 C10 N6 122.5(3) . . ?
N5 C10 N4 120.0(3) . . ?
N6 C10 N4 117.5(3) . . ?
N3 C1 N2 122.2(3) . . ?
N3 C1 N1 119.0(3) . . ?
N2 C1 N1 118.8(3) . . ?
C1 N3 C2 126.2(3) . . ?
C8 C3 C4 118.9(3) . . ?
C8 C3 C2 122.3(3) . . ?
C4 C3 C2 118.8(3) . . ?
C4 C5 C6 120.1(3) . . ?
N6 C9 C7 111.8(2) . . ?
C6 C7 C8 118.8(3) . . ?
C6 C7 C9 121.4(3) . . ?
C8 C7 C9 119.7(3) . . ?
C7 C6 C5 120.6(3) . . ?
C5 C4 C3 120.6(3) . . ?
N3 C2 C3 114.6(2) . . ?
 
_diffrn_measured_fraction_theta_max    1.000
_diffrn_reflns_theta_full              25.03
_diffrn_measured_fraction_theta_full   1.000
_refine_diff_density_max    0.227
_refine_diff_density_min   -0.419
_refine_diff_density_rms    0.064
